# Supplementary material
Source: PubMed Central journal article supplement (PMC2614663)
Supplement: NIHMS69681-supplement-01.pdf [file NIHMS69681-supplement-01.pdf]

Cell, *Volume 134*

**Supplemental Data**

**UBXD7 Binds Multiple Ubiquitin Ligases and  
Implicates p97 in HIF1 $\alpha$  Turnover**

**Gabriela Alexandru, Johannes Graumann, Geoffrey T. Smith,  
Natalie J. Kolawa, Ruihua Fang, and Raymond J. Deshaies**

**Table S1. Known p97 Cofactors Identified by Mass Spectrometry in Flag-UBX Protein Immunoprecipitates**

| <b>Protein Name</b> | <b>NPL4<br/>69461<sup>a</sup></b> | <b>UFD1<br/>38725<sup>a</sup></b> | <b>PLAP<br/>87099<sup>a</sup></b> | <b>VCIP135<br/>134320<sup>a</sup></b> | <b>p97</b>         | <b>Flag Protein</b> |
|---------------------|-----------------------------------|-----------------------------------|-----------------------------------|---------------------------------------|--------------------|---------------------|
| <b>p47</b>          | 2(2)<br>6.0%                      |                                   | 27(38)<br>42.9%                   | 14(15)<br>17.6%                       | 172(1611)<br>82.7% | 30(164)<br>47.6%    |
| <b>UBXD8</b>        | 11(209)<br>20.6%                  | 7(82)<br>29.4%                    | 10(15)<br>20.1%                   | 11(12)<br>14.1%                       | 48(3090)<br>57.6%  | 23(664)<br>44.3%    |
| <b>FAF1</b>         | 22(46)<br>36.3%                   | 13(15)<br>35.3%                   | 2(2)<br>4.8%                      | 5(5)<br>5.9%                          | 84(539)<br>68.9%   | 30(205)<br>34.2%    |
| <b>UBXD7</b>        | 14(33)<br>24.5%                   | 4(4)<br>12.5%                     | 2(2)<br>4.0%                      |                                       | 77(375)<br>61.2%   | 38(224)<br>51.3%    |
| <b>SAKS1</b>        | 7(30)<br>20.1%                    |                                   | 26(90)<br>32.1%                   | 2(2)<br>2.9%                          | 68(663)<br>57.4%   | 7(26)<br>32.0%      |
| <b>UBXD6</b>        | 9(16)<br>16.5%                    | 4(5)<br>19.2%                     |                                   | 2(2)<br>2.7%                          | 55(212)<br>59.5%   | 17(94)<br>47.0%     |
| <b>UBXD5</b>        | 2(3)<br>5.2%                      |                                   | 6(6)<br>11.6%                     | 20(25)<br>22.5%                       | 124(783)<br>75.5%  | 5(16)<br>9.4%       |
| <b>UBXD1</b>        |                                   |                                   | 3(3)<br>7.5%                      | 2(2)<br>2.5%                          | 159(1134)<br>84.3% | 45(119)<br>66.9%    |
| <b>UBXD2</b>        |                                   |                                   |                                   |                                       | 27(958)<br>41.1%   | 11(36)<br>34.3%     |
| <b>UBXD3</b>        | 7(9)<br>14.1%                     | 3(3)<br>12.2%                     |                                   |                                       | 57(254)<br>64.5%   | 17(33)<br>48.9%     |
| <b>ASPL</b>         |                                   |                                   | 10(10)<br>22.8%                   |                                       | 154(1445)<br>78.5% | 114(661)<br>78.8%   |
| <b>NPL4</b>         | 49(387)<br>51.2%                  | 14(22)<br>37.9%                   |                                   | 2(2)<br>2.5%                          | 79(414)<br>70.4%   | 49(387)<br>51.2%    |

<sup>a</sup> Molecular weight of the respective protein in Da.

The sequence count, the spectrum count (in parenthesis), and the corresponding percentage of sequence coverage are indicated for each interacting protein.

The results obtained for p97 and the UBX protein itself are shown as a reference.

**Table S2. Ubiquitin Ligases Identified by Mass Spectrometry in Flag-(UBA-UBX) Protein Immunoprecipitates**

| PROTEIN NAME                                      | IPI Identifier | MW (Da) | UBXD7                 |                        | UBXD8               |                      | FAF1                  |                       | SAKS1               |                    | p47                |   |
|---------------------------------------------------|----------------|---------|-----------------------|------------------------|---------------------|----------------------|-----------------------|-----------------------|---------------------|--------------------|--------------------|---|
|                                                   |                |         | D                     | M                      | D                   | M                    | D                     | M                     | D                   | M                  | D                  | M |
| <i>CRL<sup>Cul1</sup> components</i>              |                |         |                       |                        |                     |                      |                       |                       |                     |                    |                    |   |
| Cullin 1 <sup>a</sup>                             | 00014310       | 87388   | 3(3)<br><b>4.9</b>    | 6(10)<br><b>2.9</b>    |                     |                      | 6(8)<br><b>9.1</b>    | 5(7)<br><b>8.4</b>    | 5(7)<br><b>6.5</b>  | 2(3)<br><b>1.5</b> |                    |   |
| SKP1 <sup>a,c</sup>                               | 00301364       | 18658   | 3(4)<br><b>30.7</b>   |                        |                     |                      | 2(2)<br><b>10.7</b>   | 4(6)<br><b>33.6</b>   |                     |                    |                    |   |
| RING-box protein 1, RBX1 <sup>c</sup>             | 00003386       | 12274   |                       | 2(2)<br><b>4.1</b>     |                     |                      |                       |                       |                     |                    |                    |   |
| F-box/WD-repeat protein 1B, FBW1B <sup>a</sup>    | 00328796       | 62091   |                       |                        |                     |                      | 2(2)<br><b>3.4</b>    |                       |                     |                    |                    |   |
| <i>CRL<sup>Cul2</sup> components</i>              |                |         |                       |                        |                     |                      |                       |                       |                     |                    |                    |   |
| Cullin 2 <sup>a</sup>                             | 00014311       | 86983   | 12(16)<br><b>26.3</b> | 23(199)<br><b>57.0</b> | 4(12)<br><b>2.4</b> | 8(38)<br><b>10.3</b> | 6(6)<br><b>7.2</b>    | 3(4)<br><b>3.7</b>    | 4(11)<br><b>5.5</b> |                    | 2(2)<br><b>1.0</b> |   |
| Elongin B <sup>a</sup>                            | 00410162       | 17911   | 2(2)<br><b>16.0</b>   | 5(7)<br><b>9.7</b>     |                     |                      |                       |                       |                     |                    |                    |   |
| Elongin C <sup>a</sup>                            | 00300341       | 12473   |                       | 8(10)<br><b>20.0</b>   | 2(5)<br><b>7.0</b>  | 2(3)<br><b>5.7</b>   |                       |                       |                     |                    |                    |   |
| Von Hippel-Lindau disease tumor suppressor, VHL   | 00027969       | 24153   |                       | 2(2)<br><b>2.1</b>     |                     |                      |                       |                       |                     |                    |                    |   |
| <i>CRL<sup>Cul3</sup> components</i>              |                |         |                       |                        |                     |                      |                       |                       |                     |                    |                    |   |
| Cullin 3 <sup>a</sup>                             | 00014312       | 88930   | 13(23)<br><b>37.0</b> | 16(30)<br><b>8.4</b>   |                     |                      | 15(22)<br><b>24.6</b> | 12(12)<br><b>14.1</b> | 3(3)<br><b>2.7</b>  |                    |                    |   |
| CUL3-interacting protein 1, KLHL12 <sup>a</sup>   | 00642182       | 63277   | 6(8)<br><b>18.1</b>   | 3(3)<br><b>1.2</b>     |                     |                      |                       |                       | 2(5)<br><b>6.4</b>  |                    |                    |   |
| BTB and Kelch domain-containing protein 2, KLHL13 | 00002398       | 73908   |                       | 4(4)<br><b>1.4</b>     |                     |                      |                       |                       |                     |                    |                    |   |
| Kelch-like protein 22, KLHL22 <sup>b</sup>        | 00156791       | 71667   | 3(3)<br><b>6.0</b>    | 8(8)<br><b>2.8</b>     |                     |                      | 6(6)<br><b>8.3</b>    | 8(8)<br><b>11.7</b>   | 2(2)<br><b>2.3</b>  |                    |                    |   |

|                                                                           |          |        |                       |                      |                    |                    |                    |                    |                    |                    |                    |                    |
|---------------------------------------------------------------------------|----------|--------|-----------------------|----------------------|--------------------|--------------------|--------------------|--------------------|--------------------|--------------------|--------------------|--------------------|
| Kelch repeat and BTB domain-containing protein 7, KBTB7 <sup>b</sup>      | 00383044 | 77163  |                       | 3(3)<br><b>1.0</b>   |                    |                    | 2(2)<br><b>2.6</b> |                    | 2(2)<br><b>2.1</b> |                    |                    |                    |
| Kelch domain-containing protein 2, KLDC2 <sup>b</sup>                     | 00003793 | 46099  | 2(3)<br><b>9.3</b>    | 4(6)<br><b>3.2</b>   |                    |                    |                    |                    |                    |                    |                    |                    |
| Kelch domain-containing protein 3, KLDC3 <sup>b</sup>                     | 00062558 | 43828  |                       | 3(3)<br><b>1.7</b>   |                    |                    |                    |                    |                    |                    |                    |                    |
| Galectin-3 binding protein, LG3BP <sup>b</sup>                            | 00023673 | 65331  |                       |                      | 2(3)<br><b>0.8</b> | 2(3)<br><b>1.1</b> |                    |                    |                    |                    | 3(3)<br><b>1.5</b> |                    |
| BTB/POZ domain-containing protein 2, BTBD2 <sup>b</sup>                   | 00022826 | 55931  |                       |                      |                    |                    |                    |                    | 2(2)<br><b>2.9</b> |                    |                    |                    |
| <i>CRL<sup>Cul4</sup> components</i>                                      |          |        |                       |                      |                    |                    |                    |                    |                    |                    |                    |                    |
| Cullin 4A                                                                 | 00419273 | 87722  | 5(6)<br><b>9.8</b>    |                      |                    |                    |                    |                    |                    |                    |                    |                    |
| Cullin 4B                                                                 | 00643885 | 102756 | 7(9)<br><b>12.5</b>   | 10(11)<br><b>2.7</b> |                    |                    |                    |                    |                    |                    |                    |                    |
| DNA damage-binding protein 1, DDB1 <sup>a</sup>                           | 00293464 | 127030 | 11(11)<br><b>12.4</b> | 13(13)<br><b>2.6</b> | 2(2)<br><b>0.3</b> | 3(4)<br><b>0.7</b> |                    |                    | 2(2)<br><b>1.3</b> | 2(2)<br><b>0.7</b> | 2(2)<br><b>0.5</b> | 3(3)<br><b>1.0</b> |
| DDB1- and CUL4-associated factor 1, VprBP                                 | 00329528 | 168936 |                       | 3(4)<br><b>0.6</b>   |                    |                    |                    |                    |                    |                    |                    |                    |
| CUL4- and DDB1-associated WDR protein 2, WDR26 <sup>a</sup>               | 00414197 | 58604  | 12(19)<br><b>46.4</b> | 9(17)<br><b>7.2</b>  | 2(4)<br><b>1.2</b> |                    |                    |                    | 5(5)<br><b>8.9</b> |                    |                    |                    |
| Bromodomain and WD-repeat domain-containing protein 2, WDR11              | 00412224 | 136685 | 2(2)<br><b>2.1</b>    | 5(7)<br><b>1.3</b>   |                    |                    |                    |                    |                    |                    |                    |                    |
| WD repeat protein An11 homolog, WDR68                                     | 00006754 | 38926  |                       |                      | 2(2)<br><b>0.9</b> |                    |                    |                    |                    |                    |                    |                    |
| Bromodomain and WD-repeat domain-containing protein 1, WDR9 <sup>b</sup>  | 00250716 | 257221 | 3(4)<br><b>2.2</b>    |                      |                    |                    |                    |                    |                    |                    |                    |                    |
| Bromodomain and WD-repeat domain-containing protein 3, BRWD3 <sup>b</sup> | 00167547 | 203596 | 2(2)<br><b>1.4</b>    |                      |                    |                    |                    |                    |                    |                    |                    |                    |
| <i>Other RING-type E3 ligases</i>                                         |          |        |                       |                      |                    |                    |                    |                    |                    |                    |                    |                    |
| gp78 <sup>a</sup>                                                         | 00423874 | 72996  | 3(3)<br><b>5.9</b>    |                      | 2(2)<br><b>0.5</b> | 4(6)<br><b>1.9</b> | 2(2)<br><b>2.7</b> | 4(6)<br><b>8.6</b> | 3(3)<br><b>3.3</b> | 3(6)<br><b>3.6</b> | 3(3)<br><b>1.7</b> |                    |

|                                                          |          |        |                      |                      |                    |                     |                    |                       |                      |                      |                    |                    |
|----------------------------------------------------------|----------|--------|----------------------|----------------------|--------------------|---------------------|--------------------|-----------------------|----------------------|----------------------|--------------------|--------------------|
| UBR1                                                     | 00217405 | 200209 | 2(2)<br><b>1.4</b>   |                      | 3(3)<br><b>0.3</b> | 3(3)<br><b>0.4</b>  | 2(2)<br><b>1.0</b> |                       | 2(2)<br><b>0.8</b>   |                      |                    |                    |
| UBR2                                                     | 00217407 | 200539 | 2(3)<br><b>2.1</b>   |                      | 3(5)<br><b>0.4</b> | 2(2)<br><b>0.2</b>  | 4(4)<br><b>2.0</b> | 2(2)<br><b>1.0</b>    | 5(7)<br><b>2.8</b>   | 3(6)<br><b>1.3</b>   |                    |                    |
| Retinoblastoma-associated factor 600, UBR4 <sup>a</sup>  | 00643014 | 573849 | 12(18)<br><b>4.5</b> | 41(49)<br><b>2.1</b> | 3(5)<br><b>0.2</b> | 6(6)<br><b>0.3</b>  | 9(9)<br><b>1.6</b> | 47(56)<br><b>10.2</b> | 18(27)<br><b>3.8</b> | 30(74)<br><b>5.7</b> | 2(3)<br><b>0.2</b> |                    |
| Praja 2 <sup>a</sup>                                     | 00006557 | 78242  | 2(3)<br><b>5.5</b>   |                      | 3(3)<br><b>0.7</b> |                     | 3(3)<br><b>3.8</b> |                       | 3(3)<br><b>3.1</b>   | 2(2)<br><b>1.1</b>   |                    |                    |
| Baculoviral IAP repeat-containing protein 2, IAP2        | 00013418 | 69900  | 3(3)<br><b>6.1</b>   |                      |                    |                     |                    |                       | 2(2)<br><b>2.3</b>   |                      |                    |                    |
| E3 ubiquitin-protein ligase Topors                       | 00396077 | 119198 |                      | 3(3)<br><b>0.6</b>   |                    |                     |                    |                       |                      |                      |                    |                    |
| RING finger protein 12, RLIM                             | 00386464 | 68549  |                      |                      |                    |                     |                    |                       | 2(3)<br><b>3.5</b>   |                      |                    |                    |
| RING finger protein 126, RNF126 <sup>b</sup>             | 00155562 | 33862  |                      |                      |                    | 2(2)<br><b>1.4</b>  |                    |                       |                      |                      |                    |                    |
| <i>HECT E3 ligases</i>                                   |          |        |                      |                      |                    |                     |                    |                       |                      |                      |                    |                    |
| EDD1/UBR5 <sup>a</sup>                                   | 00026320 | 309352 |                      | 2(2)<br><b>0.2</b>   | 3(3)<br><b>0.2</b> | 9(10)<br><b>0.8</b> |                    |                       | 9(10)<br><b>2.6</b>  | 9(14)<br><b>2.0</b>  | 2(2)<br><b>0.2</b> |                    |
| E6AP ubiquitin-protein ligase, UBE3A                     | 00011609 | 100646 |                      |                      |                    | 2(2)<br><b>0.5</b>  |                    |                       |                      | 4(5)<br><b>2.2</b>   |                    |                    |
| E3 ubiquitin-protein ligase HUWE1                        | 00456919 | 481896 |                      |                      |                    | 6(6)<br><b>0.3</b>  |                    |                       |                      | 4(7)<br><b>0.6</b>   |                    |                    |
| <i>U-box E4 ligase</i>                                   |          |        |                      |                      |                    |                     |                    |                       |                      |                      |                    |                    |
| Ubiquitin conjugation factor E4 B, UBE4B (Ufd2 ortholog) | 00005715 | 146184 |                      |                      |                    |                     |                    |                       | 2(2)<br><b>1.1</b>   | 5(5)<br><b>1.5</b>   | 5(5)<br><b>1.1</b> | 5(5)<br><b>1.4</b> |

<sup>a</sup> E3 ligases/subunits identified also in p97-Myc immunoprecipitates by one spectral count or more.

<sup>b</sup> Putative E3 ligases/subunits that have not been yet demonstrated to possess ubiquitin-ligase activity or to be part of an E3 ligase complex. They were included in the list because their domain composition suggests they are likely to perform such function.

<sup>c</sup> SKP1 and RBX1 can form CRL-type of complexes with multiple cullins.

The corresponding International Protein Index (IPI) identifiers are specified and further information about the respective proteins can be found at <http://www.ebi.ac.uk/IPI/IPIhelp.html>. Whenever multiple isoforms were identified, the MW of the longest isoform is shown. The sequence count, the spectrum count (in parenthesis) and the abundance factor (bold) are indicated for each interacting protein. The exact sequence of the peptides identified is available upon request. D – DMSO, M – MG132.

The abundance factors (AF) were calculated by normalizing the spectrum count for the each E3 ligase to the spectrum count for p97 in the respective immunoprecipitate using the following formula:

$$AF = 100 \times (\text{Spectrum count E3/MW E3}) / (\text{Spectrum count p97/6} \times \text{MW p97})$$

The molecular weight for p97 has been amplified by six, because p97 exists as hexamers.

**Table S3. Plasmids Used in this Study**

| RDB Number | Plasmid Name      | Vector | ORF Source                    | Nucleotide Accession No. |
|------------|-------------------|--------|-------------------------------|--------------------------|
| 2155       | <b>Flag-UBXD7</b> | pCMV5B | Kazusa DNA Research Institute | AB018337                 |
| 2143       | <b>Flag-UBXD8</b> | pCMV5B | Open Biosystems               | BC014001                 |
| 2151       | <b>Flag-FAF1</b>  | pLPC   | Invitrogen                    | BC004970                 |
| 2150       | <b>Flag-SAKS1</b> | pLPC   | Invitrogen                    | BC000902                 |
| 2148       | <b>Flag-p47</b>   | pCMV5B | G. Warren lab                 | AB002086                 |
| 2152       | <b>Flag-UBXD1</b> | pLPC   | GeneCopoeia                   | NM_025241                |
| 2153       | <b>Flag-UBXD2</b> | pLPC   | GeneCopoeia                   | BC035594                 |
| 2149       | <b>Flag-UBXD3</b> | pLPC   | Invitrogen                    | BC036417                 |
| 2146       | <b>Flag-UBXD5</b> | pCMV2  | H. Katoh lab                  | BC078730                 |
| 2145       | <b>Flag-UBXD6</b> | pCMV2  | Open Biosystems               | BC020694                 |
| 2144       | <b>Flag-ASPL</b>  | pCMV2  | Open Biosystems               | BC018722                 |
| 2154       | <b>Flag-NPL4</b>  | pCMV2  | G. Warren lab                 | BC101887                 |
| 2147       | <b>p97-Myc</b>    | pCMV5B | G. Warren lab                 | BC049114                 |

**Table S4. siRNAs Used in this Study**

| Target gene                                 | Dharmacon Catalog No. | Name/Sense Sequence              |
|---------------------------------------------|-----------------------|----------------------------------|
| <b>HIF1<math>\alpha</math></b> <sup>a</sup> |                       | CUGAUGACCAGCAACUUGAdTdT          |
| <b>Luciferase</b>                           | P-002099-01           | CAUUCUAUCCUCUAGAGGAUGdTdT        |
| <b>p97</b>                                  | M-008727-01           | siGENOME SMART pool, Human VCP   |
| <b>UBXD7</b>                                | M-023533-00           | siGENOME SMART pool, Human UBXD7 |
| <b>UBXD8</b>                                | D-010649-03           | siGENOME duplex, Human UBXD8     |

<sup>a</sup> Elvidge, G.P., Glenny, L., Appelhoff, R.J., Ratcliffe, P.J., Ragoussis, J., and Gleadle, J.M. (2006). Concordant regulation of gene expression by hypoxia and 2-oxoglutarate-dependent dioxygenase inhibition: the role of HIF-1alpha, HIF-2alpha, and other pathways. *J Biol Chem* 281, 15215-15226.

**Table S5. Primers Used for RT-PCR**

| Name                                   | Sequence                                   |
|----------------------------------------|--------------------------------------------|
| <b>HIF1<math>\alpha</math> forward</b> | 5'- GAT GTA ATG CTC CCC TCA CCC AAC -3'    |
| <b>HIF1<math>\alpha</math> reverse</b> | 5'- CAC TGG GAC TAT TAG GCT CAG GTG -3'    |
| <b>18S rRNA forward</b>                | 5'- CGG ACA CGG ACA GGA TTG ACA GAT TG -3' |
| <b>18S rRNA reverse</b>                | 5'- GCA CAC GCT GAG CCA GTC AGT GTA G -3'  |



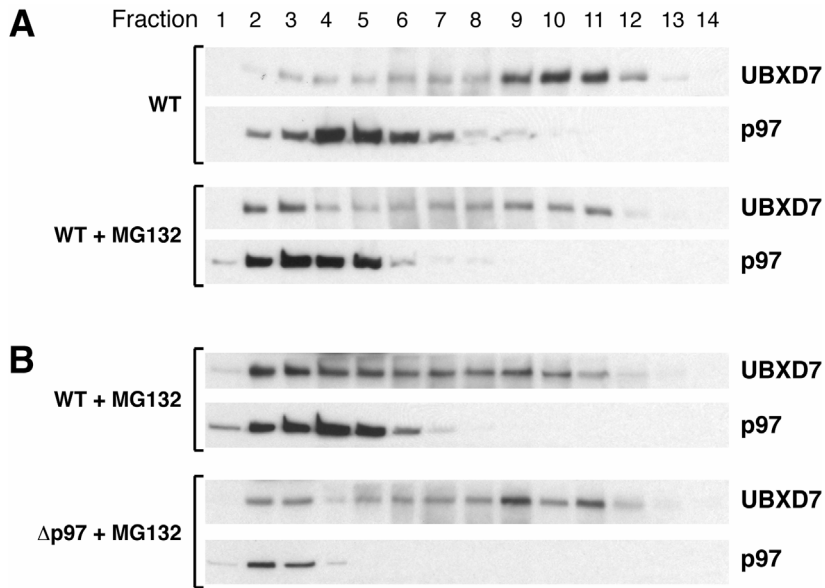

**Figure S1. UBXD7 Shifts towards p97-Positive Fractions upon MG132 Treatment**

HeLa cell extracts were fractionated on a Superdex 200 gel filtration column. Individual fractions were concentrated by TCA precipitation and subjected to western blotting using specific antibodies. (A) Comparison between cells treated or not with MG132.

(B) Comparison between cells treated with MG132 for 2 h, in which p97 was depleted by siRNA or not.

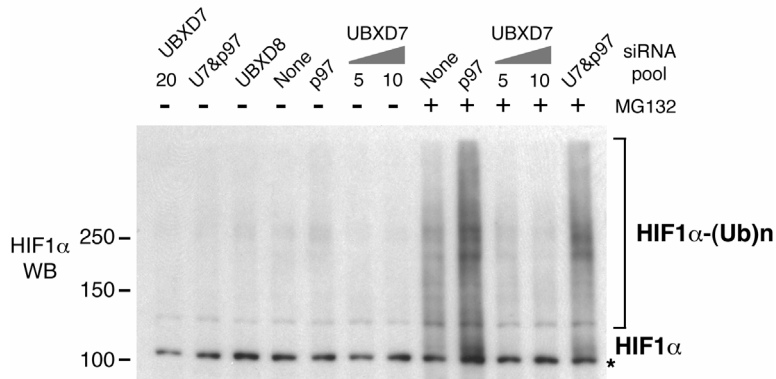

**Figure S2. UBXD7 Depletion Is Partially Epistatic to p97 Depletion with Respect to Accumulation of Ubiquitinated HIF1 $\alpha$**

The samples shown in Fig. 6A were boiled and re-analyzed by PAGE to better highlight that ubiquitinated HIF1 $\alpha$  levels in cells depleted of both p97 and UBXD7 are intermediary between WT and p97-depleted cells.
